# Supplementary material for: A BAFF ligand-based CAR-T cell targeting three receptors and multiple B cell cancers
Source: PubMed Central journal article supplement (PMC8752722; doi:10.1038/s41467-021-27853-w), 2022-01-11
Supplement: 41467_2021_27853_MOESM1_ESM.pdf [file 41467_2021_27853_MOESM1_ESM.pdf]

# Supplementary Figure 1

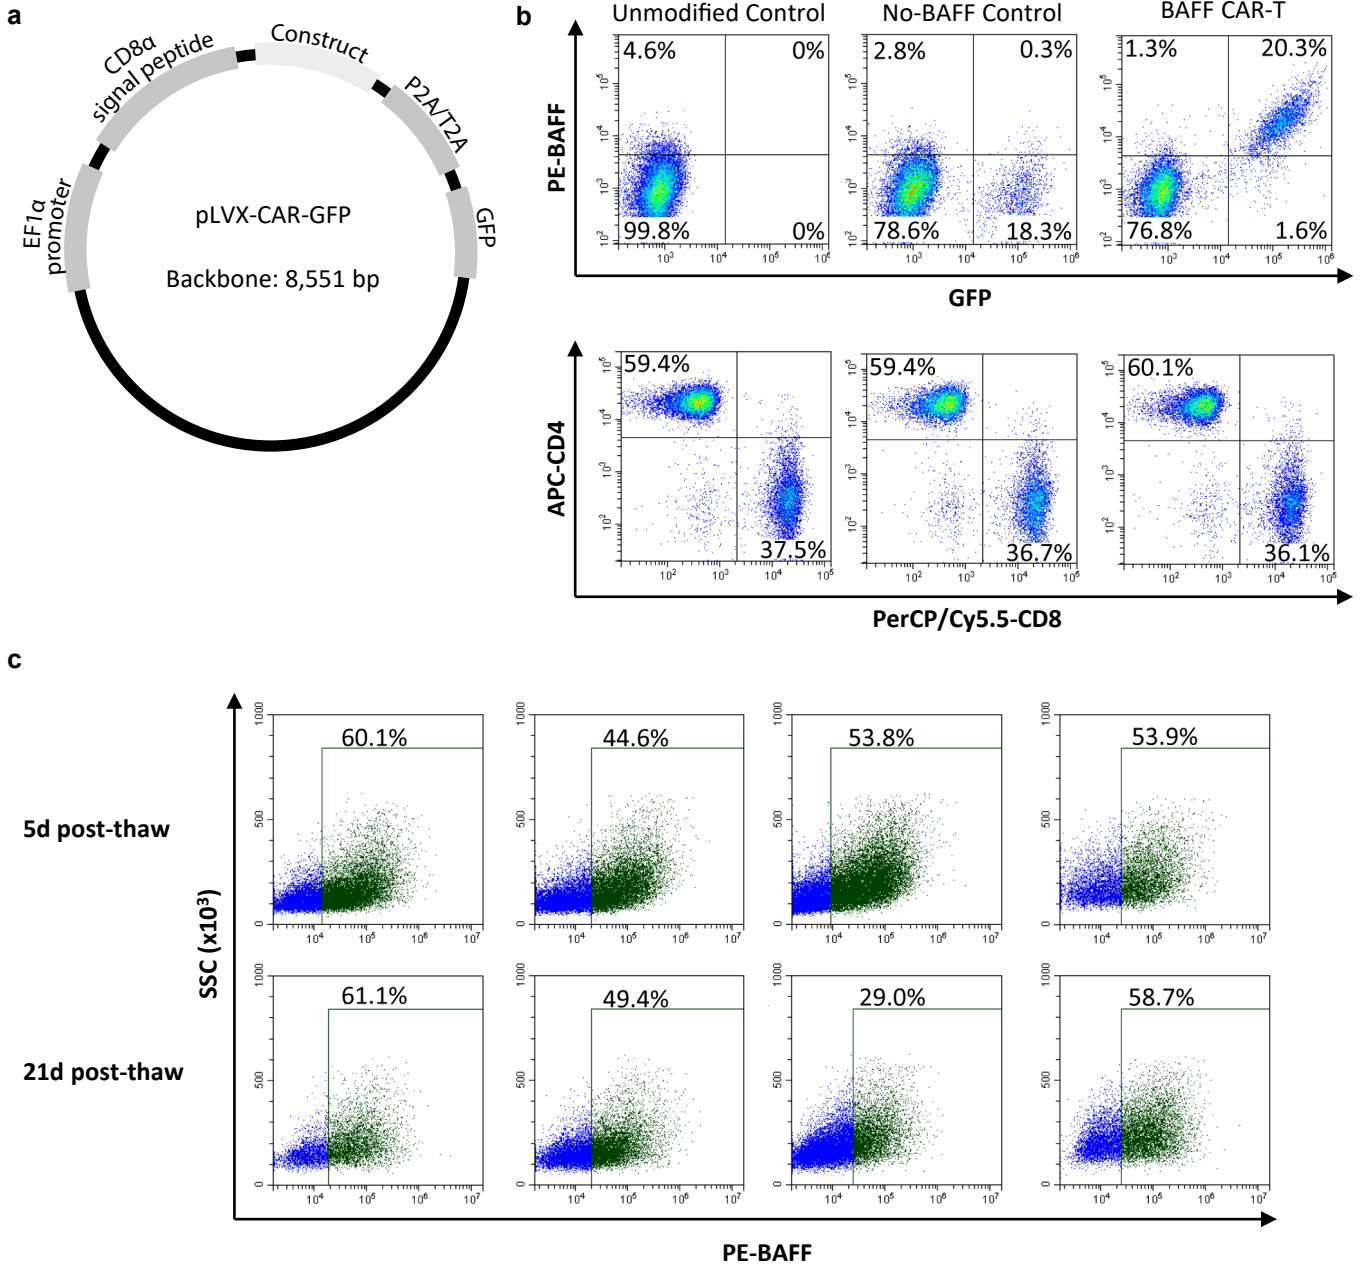

**Supplementary Figure 1. A custom lentiviral vector was used to transduce T cells and express the BAFF-CAR construct, a)** Map of the custom pLVX lentiviral vector. Expression is driven by the EF1 $\alpha$  promoter. A signal peptide derived from the leader sequence of CD8 $\alpha$  is used to direct the construct to the cell surface. GFP is expressed and cleaved from the construct downstream of a tandem P2A/T2A self-cleaving peptide sequence. **b)** BAFF-CAR and no-BAFF control lentiviral transduction efficiency in primary human T cells was measured 5 days after transduction. No-BAFF control T cells express the truncated construct that lacks BAFF ligand but still expresses GFP. **c)** Stability of BAFF CAR-T cells generated using the *TcB* transposon system was assessed by freezing T cells 7d after transfection, then thawing them and comparing cell surface BAFF expression 5 days post-thaw and 21 days post-thaw. Data are displayed for 4 different donors.

# Supplementary Figure 2

**a**

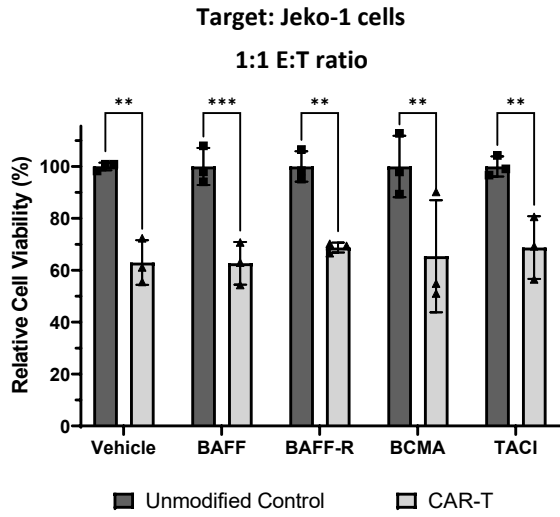

**b**

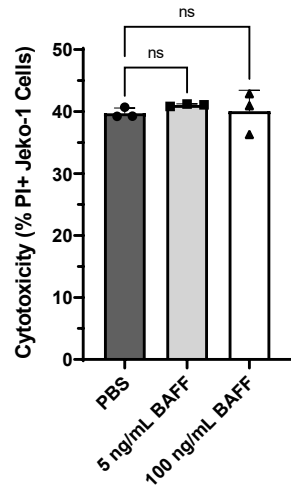

**c**

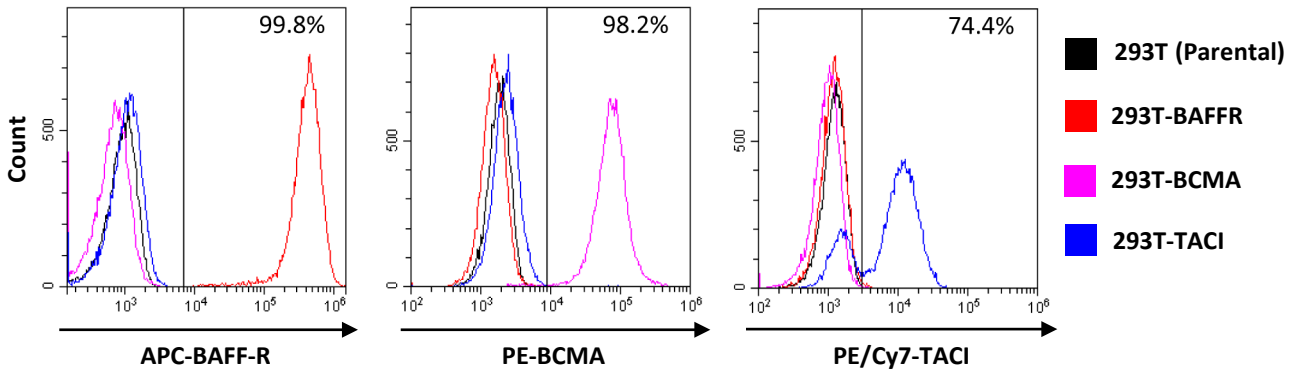

**Supplementary Figure 2. Functionality and specificity of the BAFF-CAR construct were assessed using different experimental methods. a)** CAR-T cells or unmodified T cells were co-cultured with luciferase-expressing Jeko-1 cells at 1:1 E:T ratio for 24 h in the presence of soluble recombinant BAFF or BAFF receptors to determine whether the presence of BAFF or BAFF receptors in co-culture media interferes with BAFF-CAR function. The following concentrations of soluble protein were used: BAFF = 1 ng/mL; BAFF-R = 500 ng/mL; BCMA = 2.5 ng/mL; TACI = 20 pg/mL. Vehicle served as a negative control. Luminescence was measured using a plate reader. % viability was calculated using target-only control, then normalized relative to average luminescence from target cells co-cultured with unmodified T cells. \*\*P<0.01, \*\*\*P<0.001. The following comparisons are between Unmodified Control and CAR-T: P=0.001 for Vehicle, P=0.0009 for BAFF, P=0.0052 for BAFF-R, P=0.0020 for BCMA, P=0.0053 for TACI. Mean±SD, n=3 biologically independent co-cultures, 2-way ANOVA with Šídák's multiple comparison test. Experiment was repeated with 3 different T cell donors. **b)** CAR-T cells, transduced control T cells, or unmodified T cells were co-cultured with fluorescently-labeled Jeko-1 cells at 5:1 E:T ratio for 24 h in the presence of different concentrations of soluble recombinant human BAFF at a pathophysiological concentration (5 ng/mL) or a non-physiological very high concentration (100 ng/mL) to determine whether the presence of BAFF interferes with BAFF-CAR function. ns = not significant. Mean±SD, n=3 biologically independent co-cultures, 1-way ANOVA with Dunnett's multiple comparisons test. Experiment was repeated with 2 different T cell donors. **c)** Flow cytometry was used to confirm HEK293T exogenous expression of BAFF-R, BCMA, or TACI. These cells were used in Fig. 3b to further evaluate BAFF-CAR specificity. Black = parental HEK293T; red = BAFF-R-expressing HEK293T; purple = BCMA-expressing HEK293T; blue = TACI-expressing HEK293T. Source data for all graphs are provided as a Source Data file.

### Supplementary Figure 3

**a**

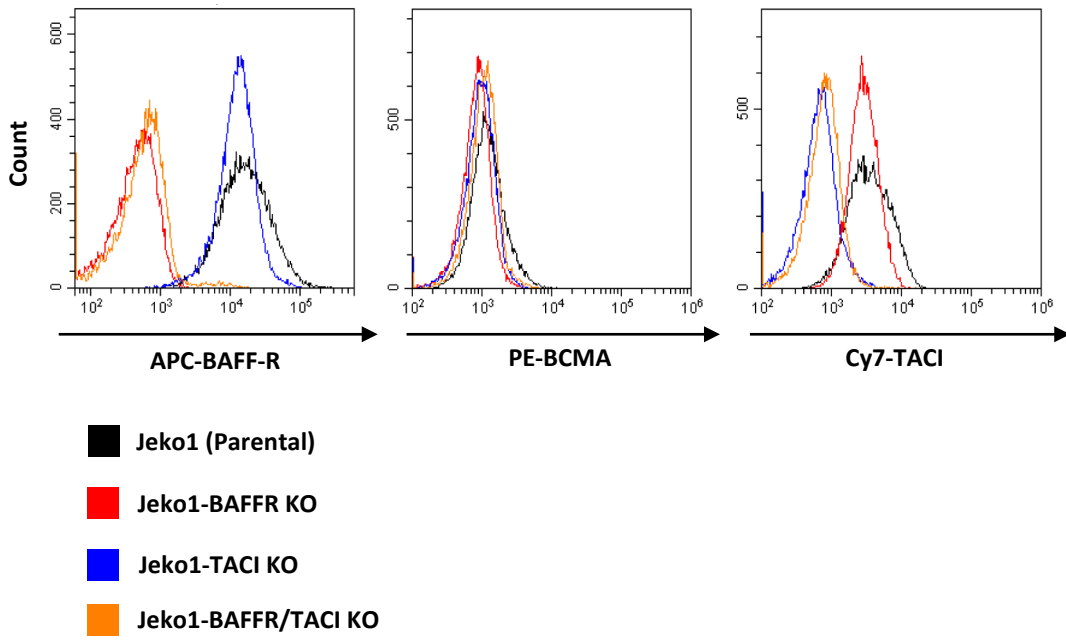

**b**

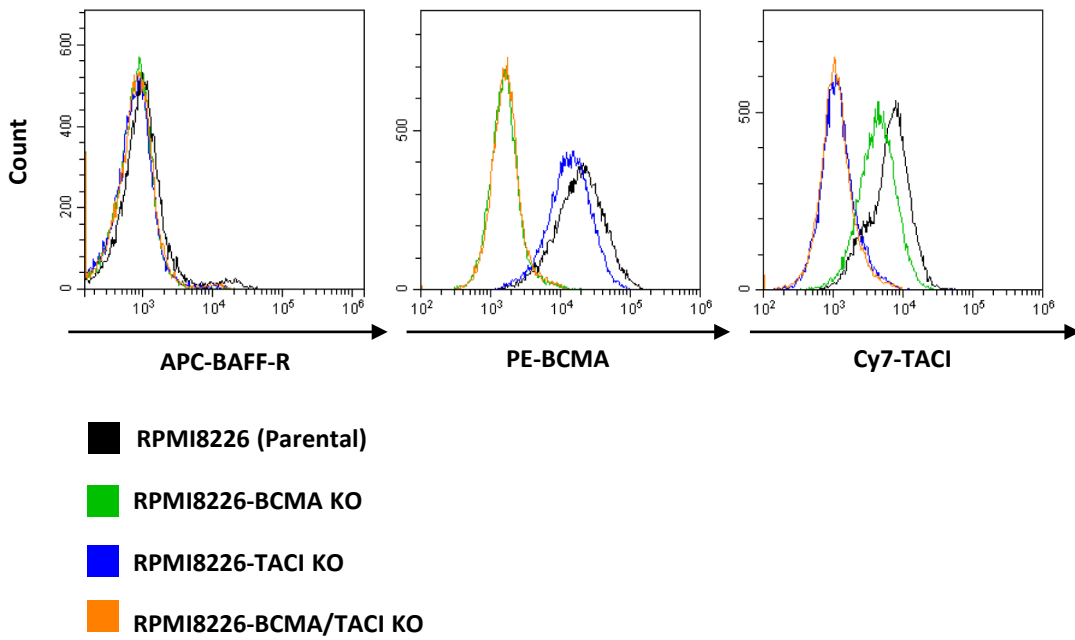

**Supplementary Figure 3. Confirmation of CRISPR knockout of the BAFF receptors in Jeko-1 and RPMI-8226 cells.** a) Flow cytometry was used to confirm CRISPR-mediated single or dual knockout of BAFF-R and TACI receptors in Jeko-1 cells. Black = parental Jeko-1; red = BAFF-R knockout Jeko-1; blue = TACI knockout Jeko-1; orange = dual BAFF-R/TACI knockout Jeko-1. b) Flow cytometry was used to confirm CRISPR-mediated single or dual knockout of BCMA and TACI receptors in RPMI-8226 cells. Black = parental RPMI-8226; green = BCMA knockout RPMI-8226; blue = TACI knockout RPMI-8226; orange = dual BCMA/TACI knockout RPMI-8226.

# Supplementary Figure 4

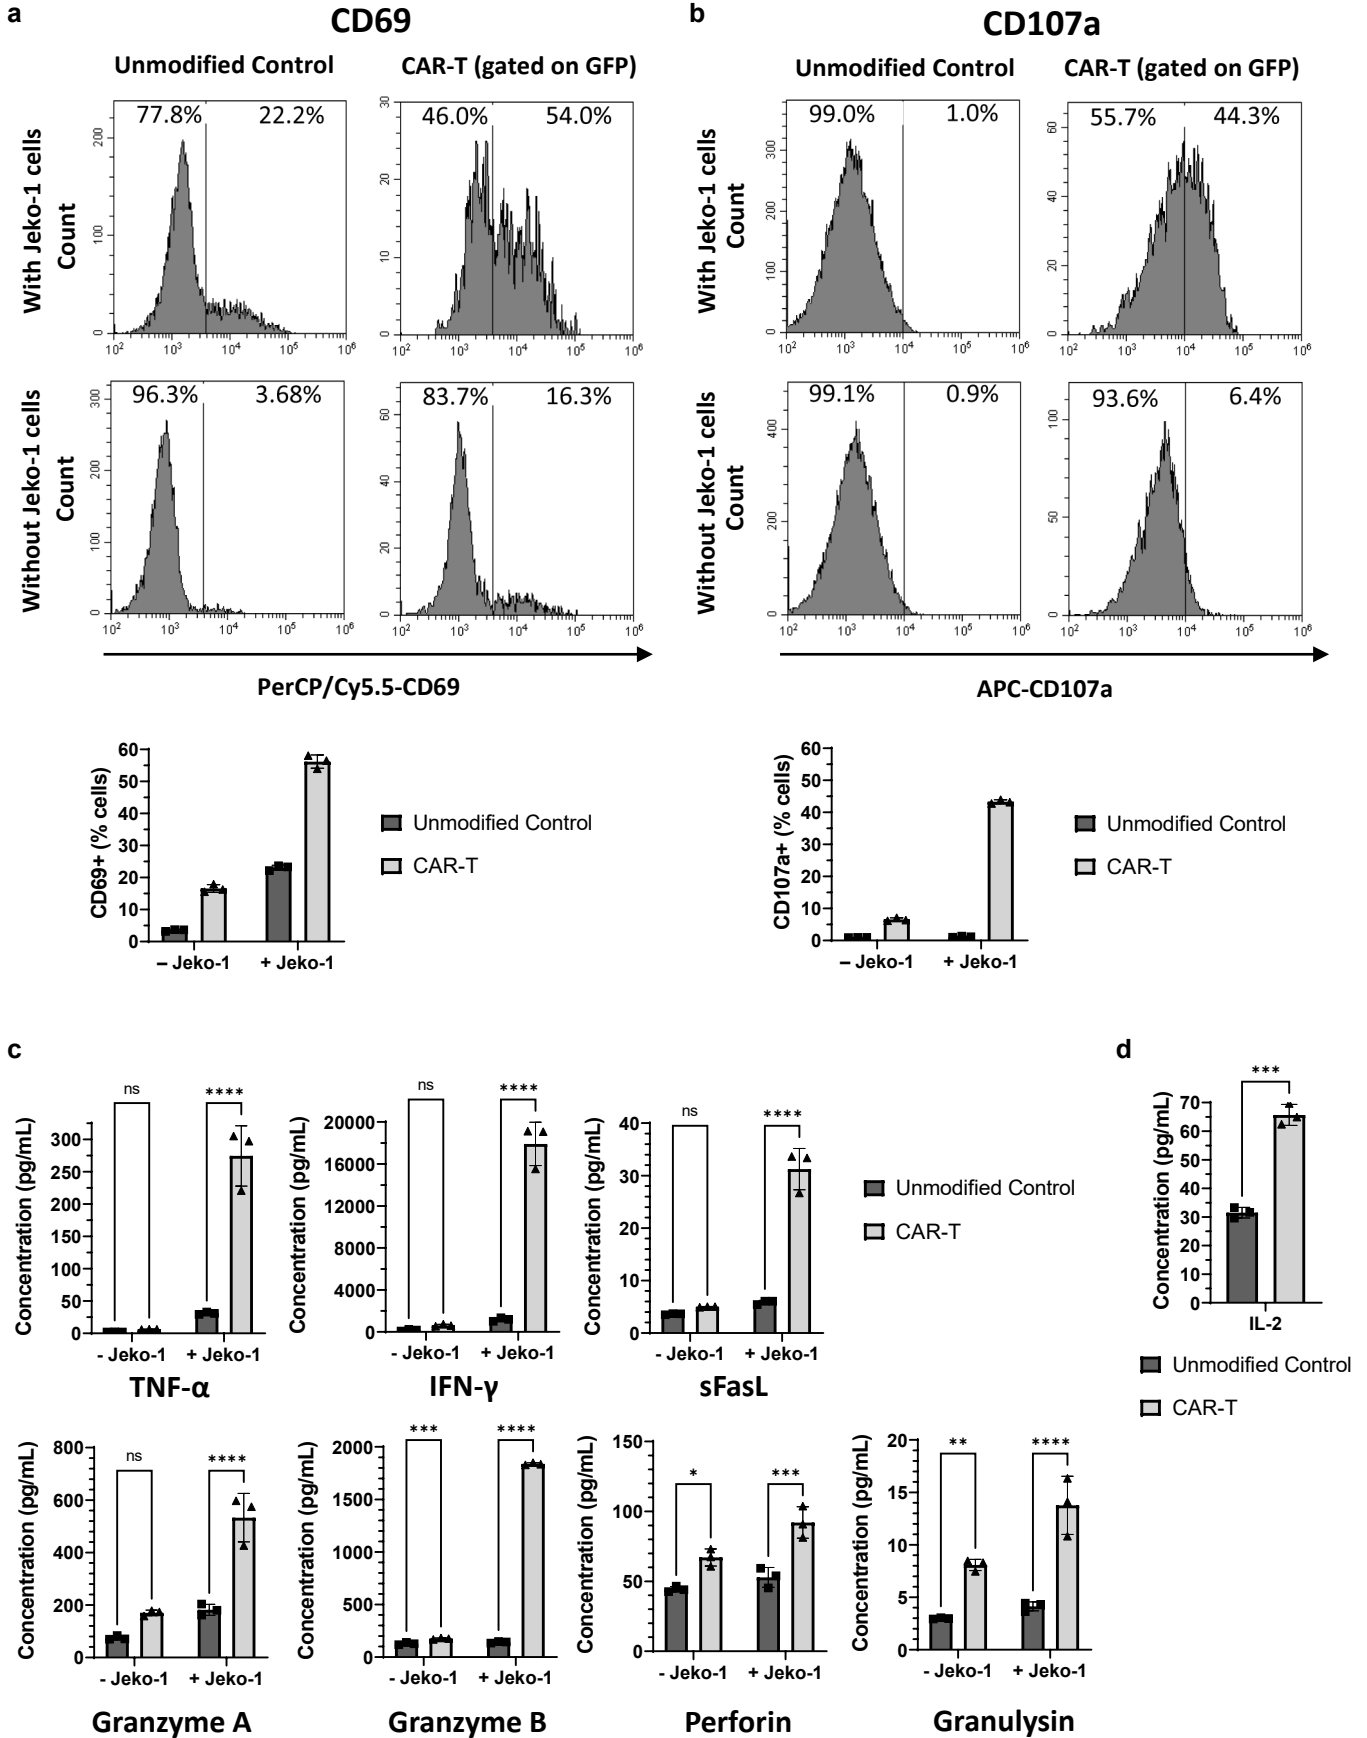

**Supplementary Figure 4. Baseline cytokine release, CD69, and CD107a expression of BAFF CAR-T cells.** **a)** T cells were cultured alone or co-cultured with labeled Jeko-1 cells at 5:1 E:T ratio for 24 h, then stained for CD69. % CD69+ T cells were measured via flow cytometry after gating on live cells and excluding labeled cancer cells; for CAR-T samples, additional gating over GFP+ cells was applied to exclude unmodified cells. Flow histograms display how CD69+ percentage was measured. Mean±SD, n=3 biologically independent co-cultures. Experiment was repeated with 2 different T cell donors. **b)** T cells were cultured alone or co-cultured with Jeko-1 cells at 5:1 E:T ratio for 6 h while staining for the degranulation marker CD107a. % CD107a+ T cells were measured via flow cytometry after gating on CD3+ cells; for CAR-T samples, additional gating over GFP+ cells was applied to exclude unmodified cells. Flow histograms display how CD107a+ percentage was measured. Mean±SD, n=3 biologically independent co-cultures. Experiment was repeated with 2 different T cell donors. **c)** T cells were cultured alone or co-cultured with Jeko-1 cells at 1:1 E:T ratio for 16h. Culture supernatant was collected to measure T cell release of pro-inflammatory cytokines and lytic enzymes. ns = not significant, \*P<0.05, \*\*P<0.01, \*\*\*P<0.001, \*\*\*\*P<0.0001. The following p-values are listed for statistically significant comparisons between Unmodified Control and CAR-T, -Jeko-1 cells: Granzyme B: P=0.0004; Perforin: P=0.011; Granulysin: P=0.0047. The following p-values are listed for statistically significant comparisons between Unmodified Control and CAR-T, + Jeko-1 cells: TNF- $\alpha$ : P<0.0001; IFN- $\gamma$ : P<0.0001; sFasL: P<0.0001; Granzyme A: P<0.0001; Granzyme B: P<0.0001; Perforin: P=0.0004; Granulysin: P<0.0001. Mean±SD, n=3 biologically independent co-culture samples, 2-way ANOVA with Šídák's multiple comparisons test. Experiment was repeated with 2 different T cell donors. **d)** T cells and Jeko-1 cells were co-cultured in IL-2-free media to measure T cell secretion of IL-2. \*\*\*P<0.001. P=0.0001 for Unmodified Control vs CAR-T. Mean±SD, n=3 biologically independent co-culture samples, unpaired two-tailed t-test. Source data for all graphs are provided as a Source Data file. Experiment was repeated with 2 different T cell donors.



# Supplementary Figure 5

a

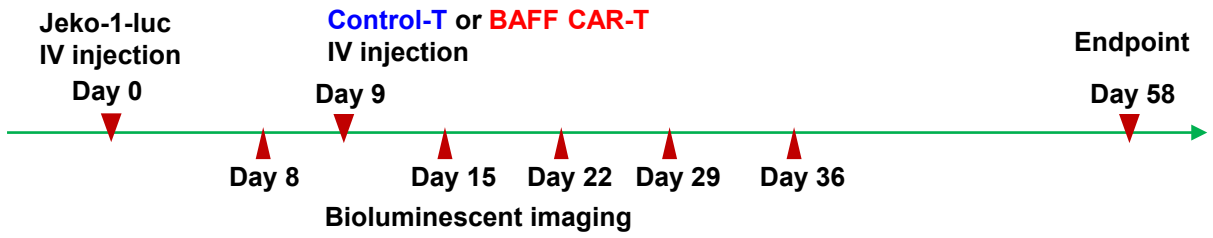

b

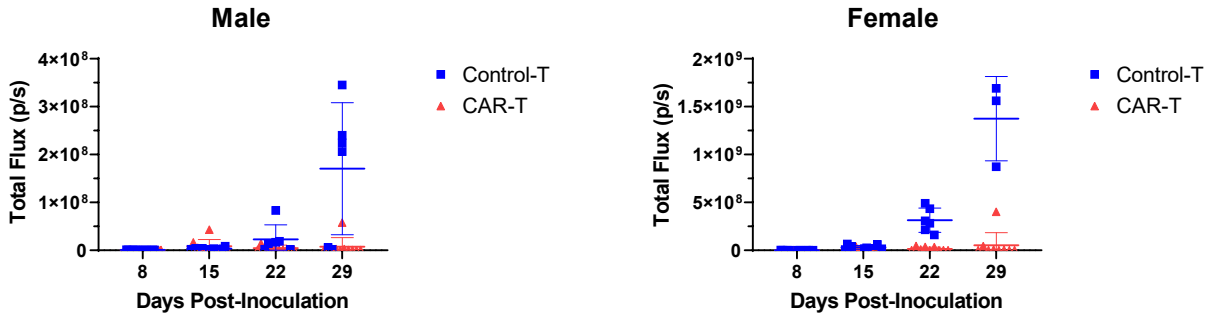

**Supplementary Figure 5. Schematic and bioluminescence quantification data for i.v. MCL xenograft model.** **a)** Schematic for intravenous MCL xenograft experiment. NSG mice were injected i.v. via tail vein with  $1.5 \times 10^6$  Jeko-1-luc cells on Day 0. On Day 9,  $10 \times 10^6$  BAFF CAR-T cells or Control-T cells were injected i.v. Bioluminescence imaging was performed weekly up to Day 36, with the experiment continuing until Day 58. **b)** Total flux (photons/s) is plotted over 36 days post-inoculation using measurements from 4 days of imaging. Blue = Control-T, red = CAR-T. Mean $\pm$ SD, n=9 mice per treatment group. Source data for all graphs are provided as a Source Data file. Experiment was repeated with 2 different T cell donors.

# Supplementary Figure 6

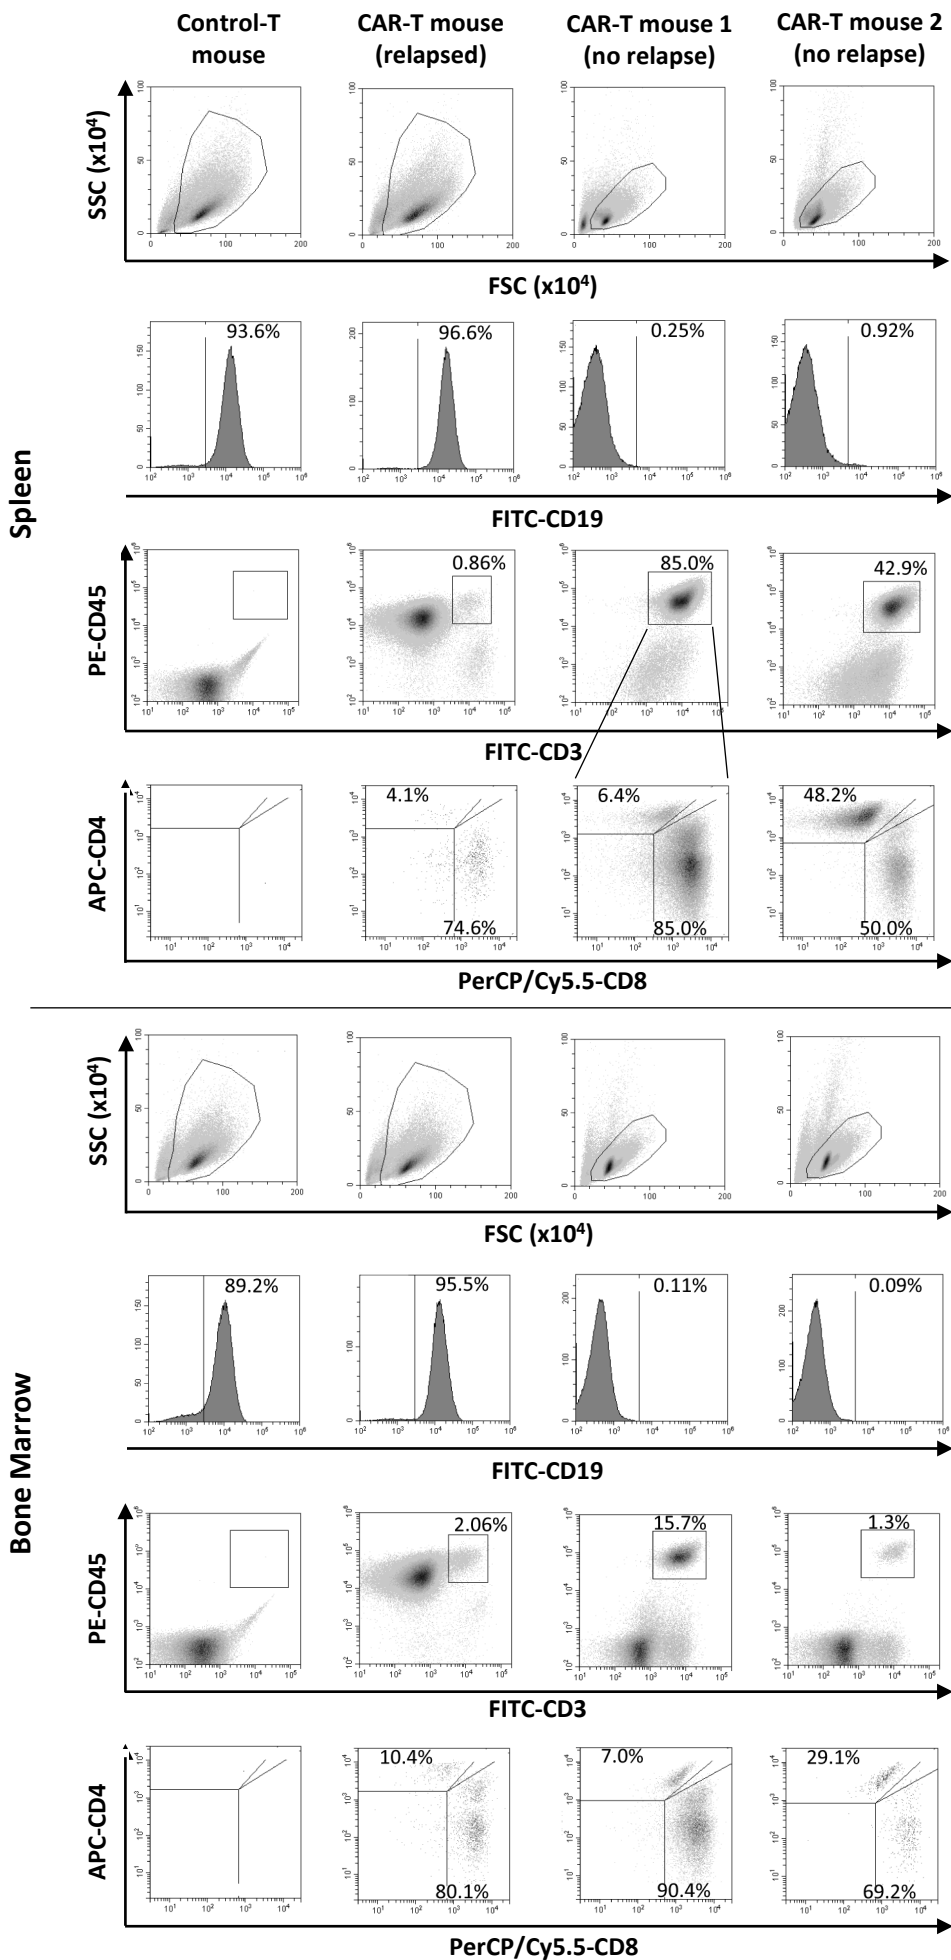

**Supplementary Figure 6. Jeko-1 cells in spleen and bone marrow of treated mice.** Spleen and bone marrow were collected from mice at time of euthanasia in the i.v. Jeko-1 experiment. After red blood cell lysis, white blood cells were stained for human CD19 or human CD3 and CD45 to detect whether Jeko-1 cells or T cells were present in these compartments. Representative flow plots and histograms from a Control-T-treated mouse, a CAR-T-treated mouse displaying cancer relapse, and two CAR-T-treated mice without detectable tumor burden are shown. Histograms display CD19+ Jeko-1 cell percentage out of total WBCs. Flow plots display CD3+/CD45+ T cell percentage out of total WBCs, as well as CD4+ and CD8+ T cell percentages out of gated T cells.



**Supplementary Figure 7. A lower dose of BAFF CAR-T cells still performs well in an i.v. Jeko-1 MCL model.** **a)** Schematic for intravenous MCL xenograft experiment with lower-dose treatment. NSG mice were injected i.v. via tail vein with  $1.5 \times 10^6$  Jeko-1-luc cells on Day 0. On Day 7,  $3 \times 10^6$  BAFF CAR-T cells, Control-T cells, or PBS alone were injected i.v. **b)** Bioluminescence imaging of mice commenced 14 days post-inoculation (7 days post-treatment) and continued weekly up to Day 70. Quantification of bioluminescence signal intensity was determined using the Living Image software (Perkin Elmer). Black = PBS, blue = Control-T, red = BAFF CAR-T.  $n=5$  mice per treatment group. **c)** Kaplan-Meier survival curves for male and female mice from the 3 different treatment groups.  $**P < 0.01$ . For male mice:  $P=0.0051$  for PBS vs BAFF CAR-T and Control-T vs BAFF CAR-T. For female mice:  $P=0.0081$  for PBS vs BAFF CAR-T and Control-T vs BAFF CAR-T.  $n=5$  mice per treatment group. Log-rank (Mantel-Cox) tests were applied, followed by Holm-Šídák correction for multiple comparisons. **d)** Summary of mouse spleen weight from separate treatment groups at time of sacrifice. Male and female mouse spleens were pooled together within each treatment group ( $n=10$  spleens per treatment group). Mean  $\pm$  SD. **e)** Pooled body weight measurements of both male and female mice from the three treatment groups throughout the study interval ( $n=10$  mice per treatment group). Mean  $\pm$  SD. **f)** Pooled body weight measurements of both male and female mice injected with BAFF CAR-T cells alone, without tumor ( $n=10$  mice). Mice were tracked over a 70-day period. Mean  $\pm$  SD. **g)** Serum from healthy untreated mice (Control) and healthy mice injected with  $3 \times 10^6$  BAFF CAR-T cells alone, both without tumor inoculation, were collected on 70 days post-injection. Serum alanine aminotransferase (ALT) and aspartate aminotransferase (AST) activity were assayed to assess liver enzyme levels in circulation. ns = not significant. Mean  $\pm$  SD,  $n=5$  mice, 3 technical triplicates per serum sample, unpaired two-tailed t-test. Source data for all graphs are provided as a Source Data file. Experiment was repeated with 2 different T cell donors.

# Supplementary Figure 8

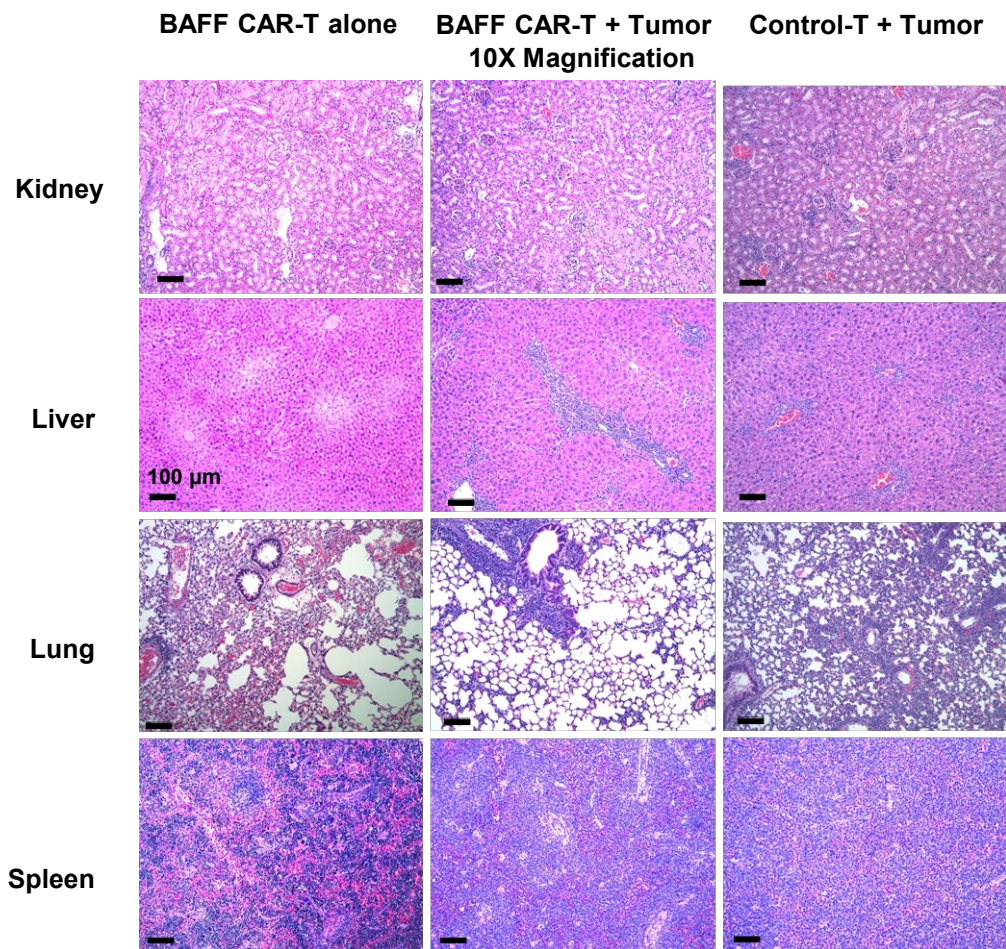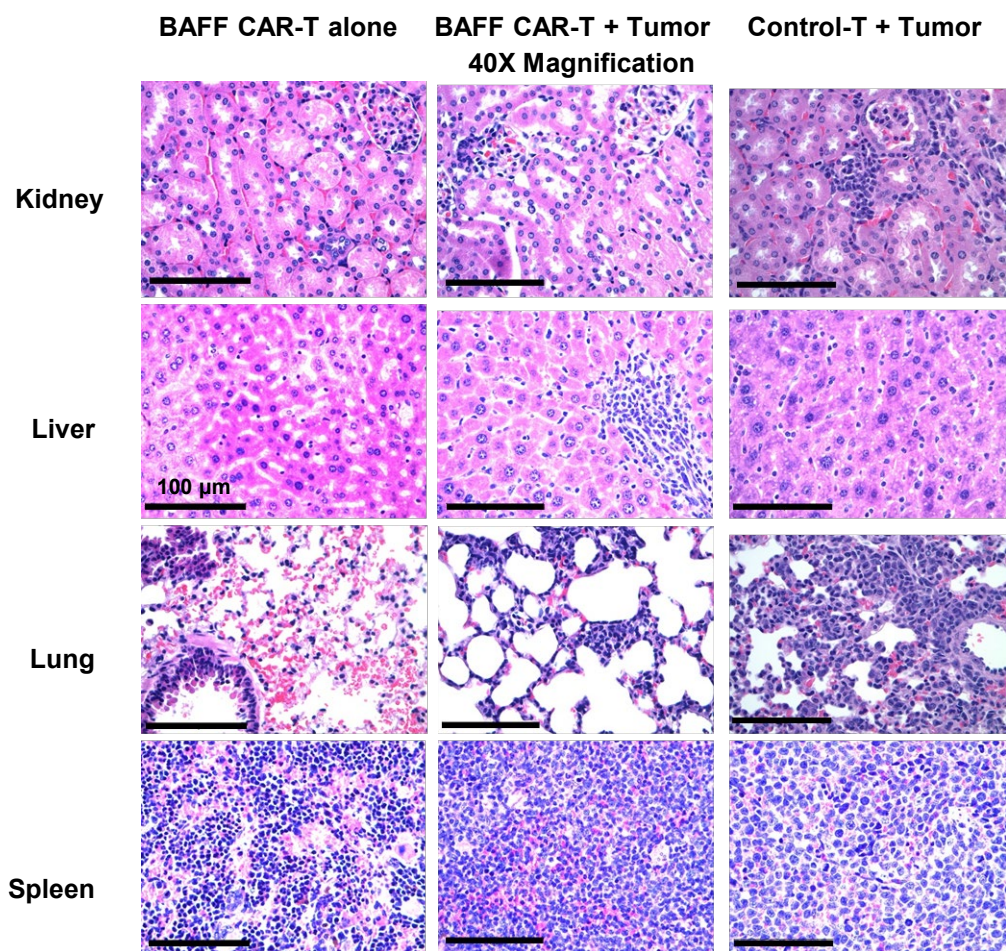

**Supplementary Figure 8. Histology shows no significant tissue damage from BAFF CAR-T treatment in i.v. Jeko-1 MCL model.** Histological sections of tissues from mice treated with BAFF CAR-T cells alone without tumor, BAFF CAR-T + Tumor, and Control-T + Tumor are shown. Kidney, liver, lung, and spleen were harvested from euthanized mice 30-75 days post-inoculation, and tissue sections were stained with hematoxylin and eosin. No lesions were apparent and no significant tissue damage was noted in BAFF CAR-T injected mice compared to Control-T cell injected mice. Normal architecture was maintained and there were no obvious, significant differences in the structures of the kidney, liver, lung, and spleen between the BAFF CAR-T-treated and Control-T-treated groups (scale bar = 100  $\mu$ m, 10X and 40X magnifications are shown). Histological sections were obtained from n=3 mice per treatment group in the experiment described in Supplementary Fig. 7. Displayed images are representative of mice from each treatment group.



## Supplementary Figure 9

**a**

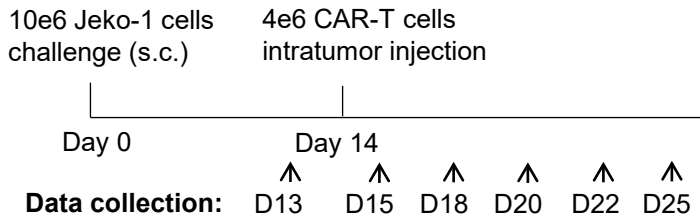

**b**

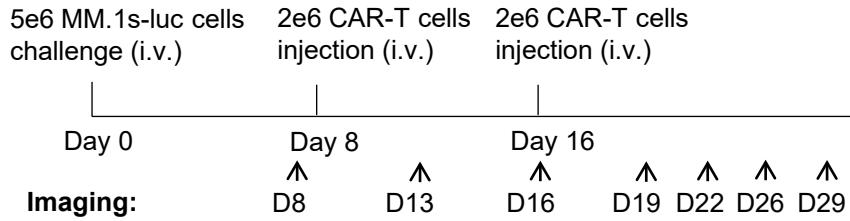

**c**

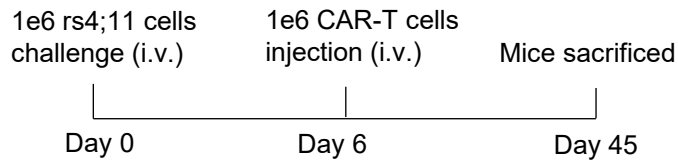

**d**

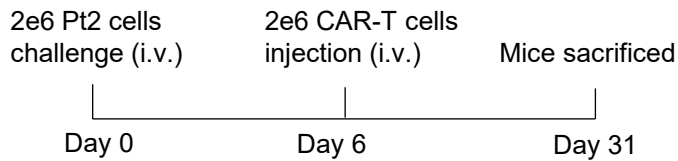

**Supplementary Figure 9. Schematics for s.c. MCL, i.v. MM, and i.v. ALL xenograft models.** **a)** 10e6 Jeko-1 cells were injected into NSG mice subcutaneously above the flank on Day 0. After palpable tumor formation, 4e6 CAR-T cells, unmodified Control-T cells, or PBS alone were injected intratumorally on Day 14. Tumor width and length were measured every 2-3 days, as indicated. **b)** 5e6 MM.1s cells were injected into NSG mice intravenously via tail vein on Day 0. 2e6 CAR-T cells or unmodified Control-T cells were injected i.v. on Day 8 and Day 16 after tumor implantation was confirmed. Bioluminescence imaging was continued up to Day 29 post-inoculation. **c)** 1e6 rs4;11 cells were injected into NSG mice intravenously via tail vein on Day 0. 1e6 CAR-T cells or PBS alone were injected via tail vein on Day 6. Mice were sacrificed at the endpoint, Day 45 post-inoculation. **d)** 2e6 Patient ALL (Pt2) cells were injected into NSG mice intravenously via tail vein on Day 0. 2e6 CAR-T cells or PBS alone were injected via tail vein on Day 6. Mice were sacrificed at the endpoint, Day 31 post-inoculation.



**Supplementary Figure 10. Flow cytometry gating strategies.** **a)** CD69+ T cell staining strategy. Labeled tumor cells were excluded and BAFF CAR-T samples were gated on live GFP+ cells, while unmodified T cell samples were gated on live cells. CD69 histograms correspond to panels in Supplementary Fig. 4a. **b)** CD107a+ T cell staining strategy. BAFF CAR-T samples were gated on live CD3+ GFP+ cells, while unmodified T cell samples were gated on live CD3+ cells. CD107a histograms correspond to panels in Supplementary Fig. 4b. **c)** BAFF receptor staining on tumor cells from xenograft models. Single cell suspensions from mouse spleen and bone marrow were gated on CD19+ tumor cells. BAFF-R, BCMA, and TACI histograms correspond to panels in Fig. 6e.

### Supplementary Table 1

| Name                     | Total unique insertion sites | Insertion sites not in transcript (%) | Insertion sites within transcript (%) | Insertion sites within intron (%) | Insertion sites within exon (%) | Insertion sites within coding exon (%) | Median distance to transcriptional start site | Most abundant clone reads % | Top 10 most abundant clone reads % |
|--------------------------|------------------------------|---------------------------------------|---------------------------------------|-----------------------------------|---------------------------------|----------------------------------------|-----------------------------------------------|-----------------------------|------------------------------------|
| <i>TcB-M</i> Donor 1     | 14,931                       | 41.8%                                 | 58.2%                                 | 54.4%                             | 6.3%                            | 1.1%                                   | 19.6                                          | 0.05%                       | 0.4%                               |
| <i>TcB-M</i> Donor 10    | 7,382                        | 38.3%                                 | 61.7%                                 | 57.7%                             | 6.6%                            | 0.7%                                   | 17.3                                          | 0.08%                       | 0.7%                               |
| <i>TcB-M</i> Donor 11    | 14,364                       | 38.4%                                 | 61.6%                                 | 57.3%                             | 7.1%                            | 1.3%                                   | 17.2                                          | 0.05%                       | 0.4%                               |
| <i>TcB-M</i> Donor 13    | 20,781                       | 41.3%                                 | 58.7%                                 | 54.9%                             | 6.3%                            | 1.1%                                   | 19.6                                          | 0.04%                       | 0.4%                               |
| <i>TcB-M</i> Donor 15    | 37,997                       | 40.5%                                 | 59.5%                                 | 56.1%                             | 5.7%                            | 1.1%                                   | 19.8                                          | 0.03%                       | 0.2%                               |
| <i>TcB-M</i> Donor 16    | 8,974                        | 39.2%                                 | 60.8%                                 | 56.7%                             | 6.6%                            | 1.0%                                   | 17.6                                          | 0.07%                       | 0.6%                               |
| <i>TcB-M</i> Donor 17    | 18,773                       | 39.7%                                 | 60.3%                                 | 56.4%                             | 6.4%                            | 1.0%                                   | 18.7                                          | 0.04%                       | 0.4%                               |
| <i>TcB-M</i> Donor 18    | 31,417                       | 40.5%                                 | 59.5%                                 | 55.7%                             | 6.4%                            | 1.2%                                   | 18.4                                          | 0.02%                       | 0.2%                               |
| Transposon Only Donor 1  | 416                          | 49.8%                                 | 50.2%                                 | 49.0%                             | 2.4%                            | 1.0%                                   | 28.0                                          | 1.19%                       | 9.9%                               |
| Transposon Only Donor 10 | 30                           | 46.7%                                 | 53.3%                                 | 53.3%                             | 0.0%                            | 0.0%                                   | 14.7                                          | 8.06%                       | 59.2%                              |
| Transposon Only Donor 11 | 21                           | 42.9%                                 | 57.1%                                 | 57.1%                             | 0.0%                            | 0.0%                                   | 24.6                                          | 11.81%                      | 74.8%                              |
| Transposon Only Donor 13 | 212                          | 43.9%                                 | 56.1%                                 | 54.7%                             | 1.9%                            | 0.0%                                   | 28.2                                          | 1.93%                       | 16.9%                              |
| Transposon Only Donor 15 | 4                            | 50.0%                                 | 50.0%                                 | 50.0%                             | 25.0%                           | 0.0%                                   | 73.0                                          | 47.06%                      | 100.0%                             |
| Transposon Only Donor 16 | 67                           | 49.3%                                 | 50.7%                                 | 47.8%                             | 3.0%                            | 0.0%                                   | 20.0                                          | 10.67%                      | 54.2%                              |
| Transposon Only Donor 17 | 39                           | 64.1%                                 | 35.9%                                 | 30.8%                             | 5.1%                            | 0.0%                                   | 61.3                                          | 8.36%                       | 58.2%                              |
| Transposon Only Donor 18 | 83                           | 50.6%                                 | 49.4%                                 | 43.4%                             | 6.0%                            | 1.2%                                   | 36.2                                          | 6.77%                       | 39.3%                              |
| <i>PiggyBac</i>          | 22,620<br>±21,456            | 42.20%<br>±3.52%                      | 57.80%<br>±3.52%                      | 55.78%<br>±2.83%                  | 3.69%<br>±1.77%                 | 0.36%<br>±0.28%                        | 23.6 ±6.0                                     | 2.52%<br>±1.74%             | 9.12%<br>±2.83%                    |
| <i>Sleeping Beauty</i>   | 34,213<br>±20,317            | 49.61%<br>±4.46%                      | 50.39%<br>±4.46%                      | 49.40%<br>±4.14%                  | 1.68%<br>±0.63%                 | 0.14%<br>±0.06%                        | 33.8 ±5.2                                     | 2.58%<br>±1.37%             | 13.80%<br>±7.76%                   |
| Lentivirus (Wang)        | 27,482<br>±990               | 15.24%<br>±0.19%                      | 84.76%<br>±0.19%                      | 79.92%<br>±0.10%                  | 7.75%<br>±0.12%                 | 3.05%<br>±0.23%                        | 14.0 ±0.3                                     | 0.50%<br>±0.25%             | 0.96%<br>±0.34%                    |
| Lentivirus (Brady)       | 273 ±51                      | 14.72%<br>±1.20%                      | 85.28%<br>±1.20%                      | 81.16%<br>±1.89%                  | 8.15%<br>±3.27%                 | 3.18%<br>±1.32%                        | 11.2 ±2.1                                     | 2.17%<br>±0.56%             | 12.96%<br>±1.98%                   |
| Random (in silico)       |                              | 46.38%<br>±0.18%                      | 53.62%<br>±0.18%                      | 51.02%<br>±0.19%                  | 4.24%<br>±0.08%                 | 1.25%<br>±0.04%                        | 30.0 ±0.1                                     |                             |                                    |

**Supplementary Table 1 – TcB integration site analysis for individual T cell donors.**

Total unique insertion sites, location of insertion sites, and median distance to transcriptional start sites are listed for each individual donor T cells that were transfected with both *TcB* transposase RNA and the BAFF-CAR transposon plasmid or with the transposon only. Data for *PiggyBac* and *Sleeping Beauty* transposons<sup>1</sup>, Wang *et al.* and Brady *et al.* lentiviral transduction datasets<sup>2,3</sup>, and random (in silico) integration values are also listed for comparison.

## Supplementary Table 2

| <b>Antibody</b>                | <b>Catalog #</b> | <b>Clone</b> |
|--------------------------------|------------------|--------------|
| BAFF (PE, anti-human)          | 318605           | T7-241       |
| BAFF-R (APC, anti-human)       | 316916           | 11C1         |
| BCMA (PE, anti-human)          | 357504           | 19F2         |
| TACI (PE/Cy7, anti-human)      | 311907           | 1A1          |
| CD19 (FITC, anti-human)        | 392508           | 4G7          |
| CD4 (APC, anti-human)          | 357408           | A161A1       |
| CD8 (PerCP/Cy5.5, anti-human)  | 344708           | SK1          |
| CD3 (FITC, anti-human)         | 300306           | HIT3a        |
| CD3 (PE, anti-human)           | 300308           | HIT3a        |
| CD45 (PE, anti-human)          | 368510           | 2D1          |
| CD69 (PerCP/Cy5.5, anti-human) | 310926           | FN50         |
| CD107a (APC, anti-human)       | 328619           | H4A3         |

**Supplementary Table 2 – Flow cytometry antibodies.** Flow cytometry antibodies were obtained from Biolegend and used at 1/50 dilution.



## Supplementary References

- 1 Gogol-Doring, A. *et al.* Genome-wide Profiling Reveals Remarkable Parallels Between Insertion Site Selection Properties of the MLV Retrovirus and the piggyBac Transposon in Primary Human CD4(+) T Cells. *Mol Ther* **24**, 592-606, doi:10.1038/mt.2016.11 (2016).
- 2 Wang, G. P., Ciuffi, A., Leipzig, J., Berry, C. C. & Bushman, F. D. HIV integration site selection: analysis by massively parallel pyrosequencing reveals association with epigenetic modifications. *Genome Res* **17**, 1186-1194, doi:10.1101/gr.6286907 (2007).
- 3 Brady, T. *et al.* HIV integration site distributions in resting and activated CD4+ T cells infected in culture. *AIDS* **23**, 1461-1471, doi:10.1097/QAD.0b013e32832caf28 (2009).
